# Supplementary material for: A short and modular approach towards 3,5-disubstituted indolizidine alkaloids
Source: Royal Society of Chemistry journal article supplement (doi:10.1039/c6ob01308b), 2016-01-01
Supplement: c6ob01308b1.pdf [file c6ob01308b1.pdf]

# A Short and Modular Approach towards 3,5-Disubstituted Indolizidine Alkaloids

*Marco M. Nebe, Sina Zinn and Till Opatz\**

Institute of Organic Chemistry, University of Mainz, Duesbergweg 10-14, D-55128

Mainz, Germany

E-mail: opatz@uni-mainz.de

## Supporting Information

### Content

|                                                                                                        |         |
|--------------------------------------------------------------------------------------------------------|---------|
| <sup>1</sup> H and <sup>13</sup> C NMR spectra                                                         | S02–S09 |
| <sup>1</sup> H- <sup>1</sup> H-NOE-spectra of compounds <b>9</b> , <b>12</b> , <b>18</b> and <b>19</b> | S10–S11 |

<sup>1</sup>H and <sup>13</sup>C NMR spectra

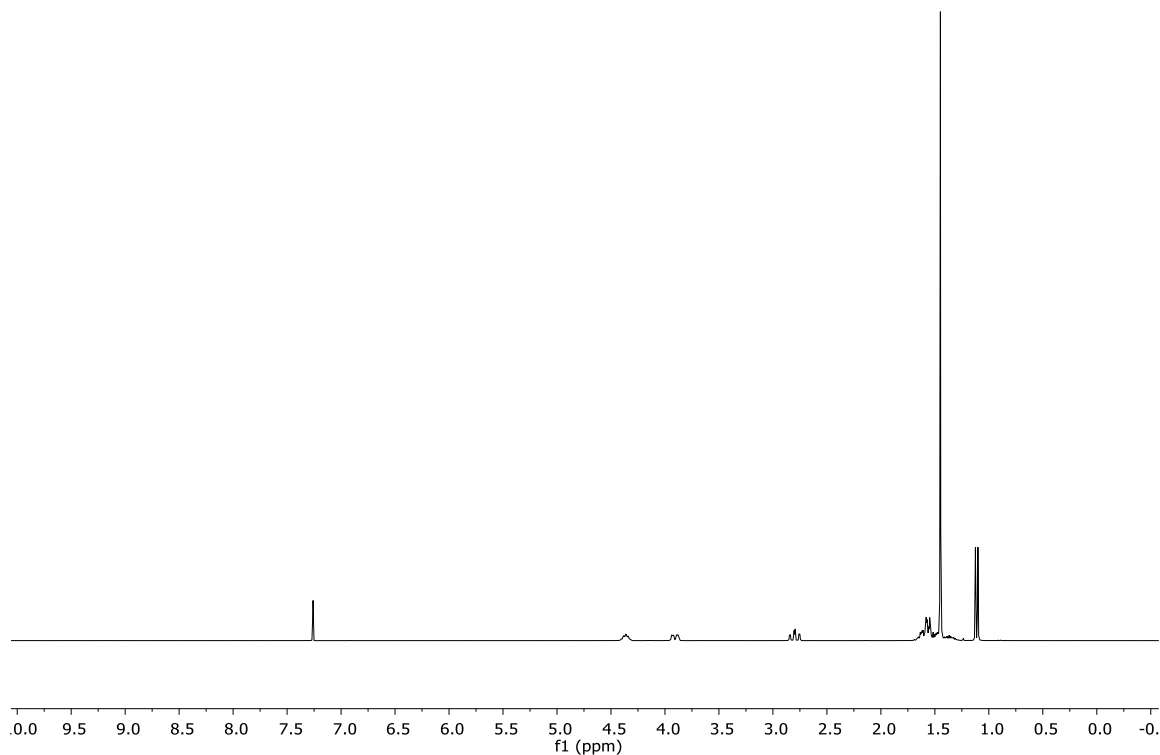

***tert*-Butyl 2-methylpiperidine-1-carboxylate (5):** <sup>1</sup>H-NMR (300 MHz, CDCl<sub>3</sub>).

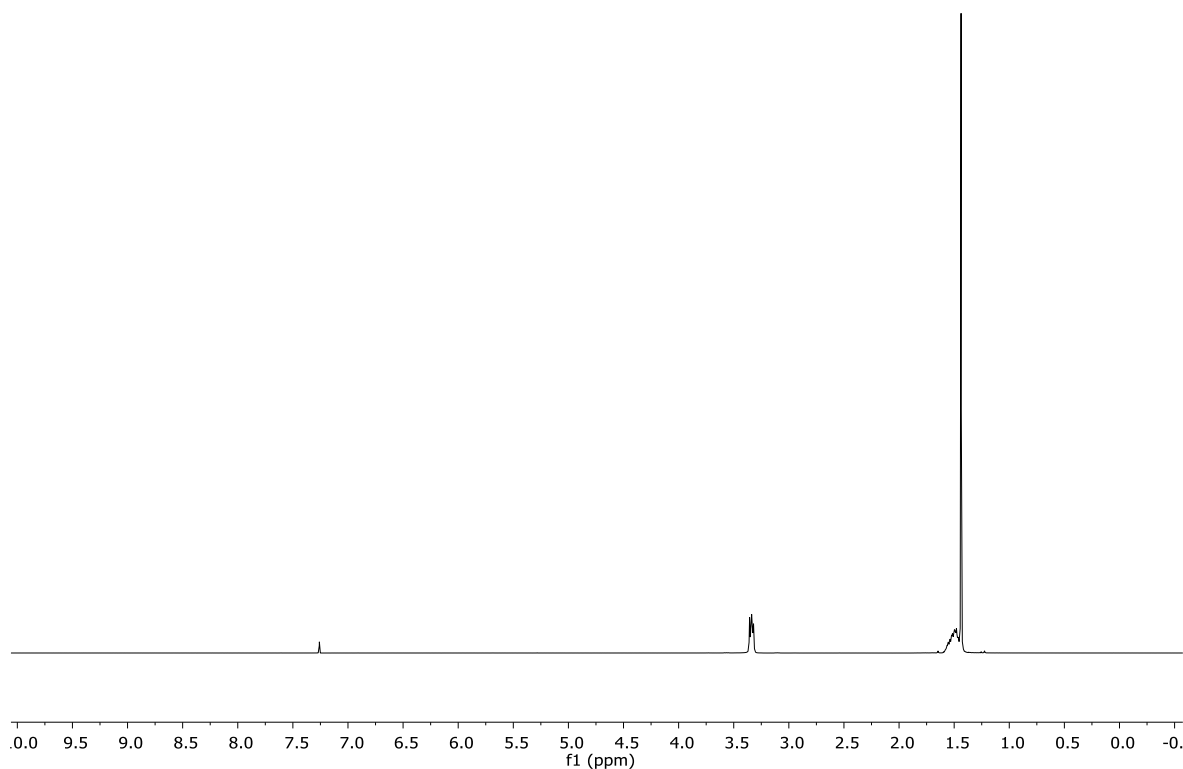

***tert*-Butyl piperidine-1-carboxylate (14):** <sup>1</sup>H-NMR (300 MHz, CDCl<sub>3</sub>).

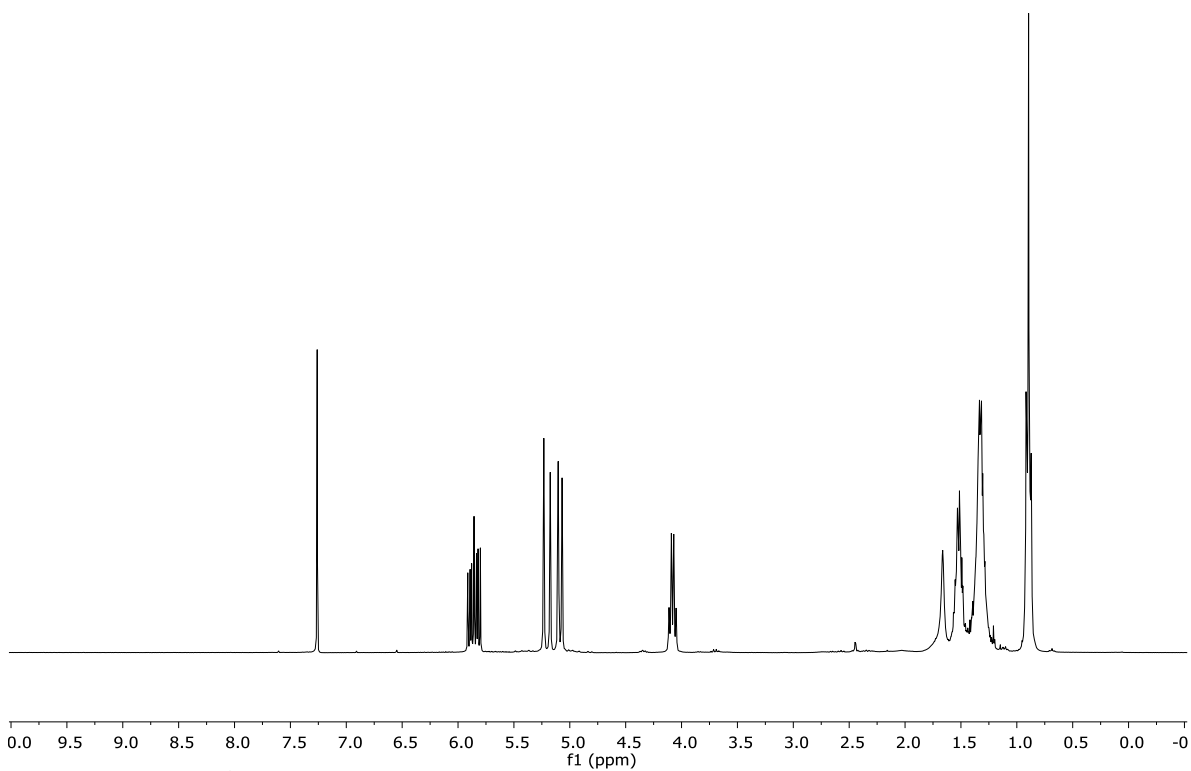

**Hept-1-en-3-ol:**  $^1\text{H-NMR}$  (300 MHz,  $\text{CDCl}_3$ ).

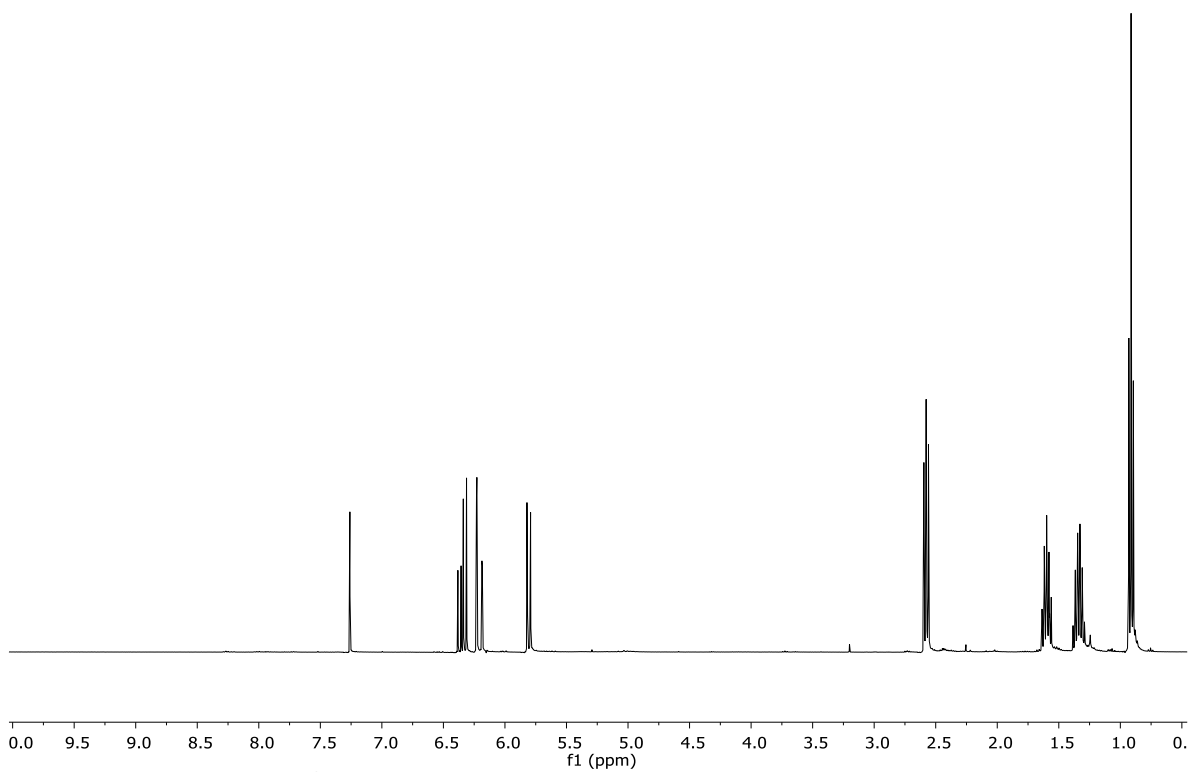

**Hept-1-en-3-one (17):**  $^1\text{H-NMR}$  (400 MHz,  $\text{CDCl}_3$ ).

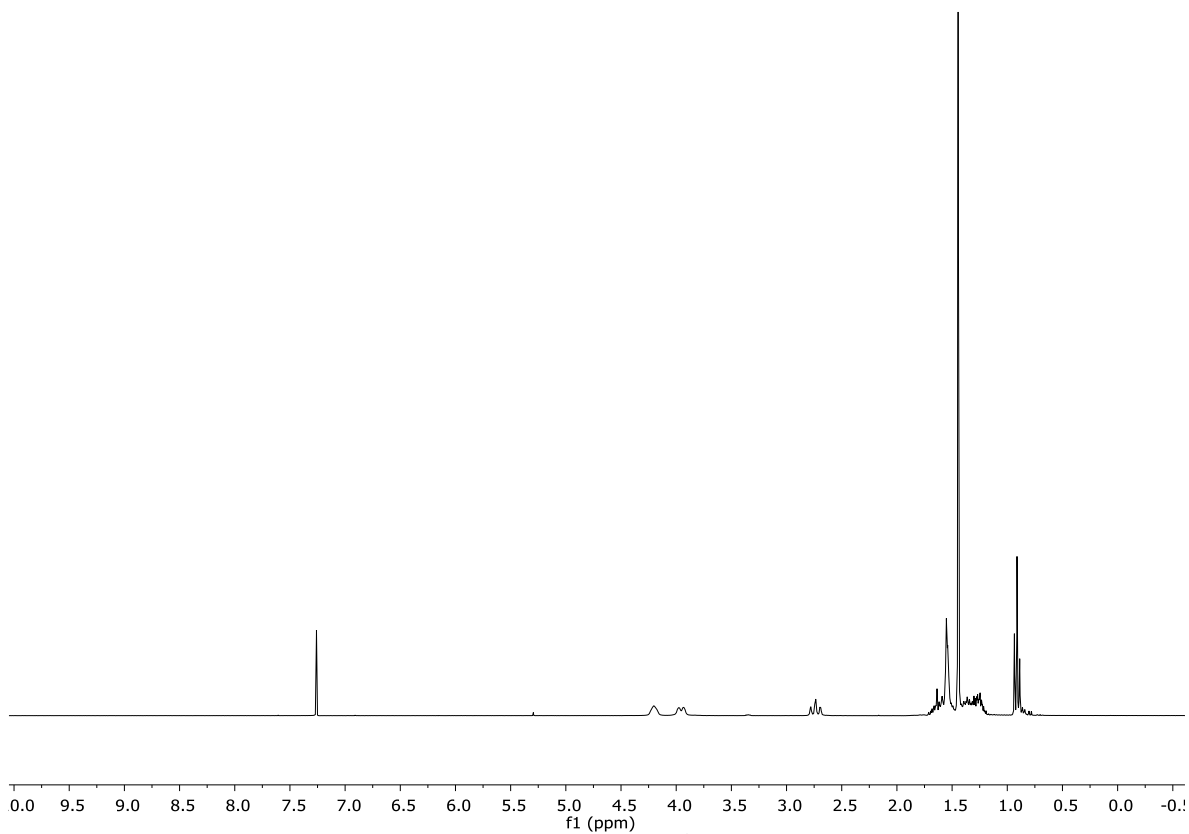

***tert*-Butyl 2-propylpiperidine-1-carboxylate (15):** <sup>1</sup>H-NMR (300 MHz, CDCl<sub>3</sub>).

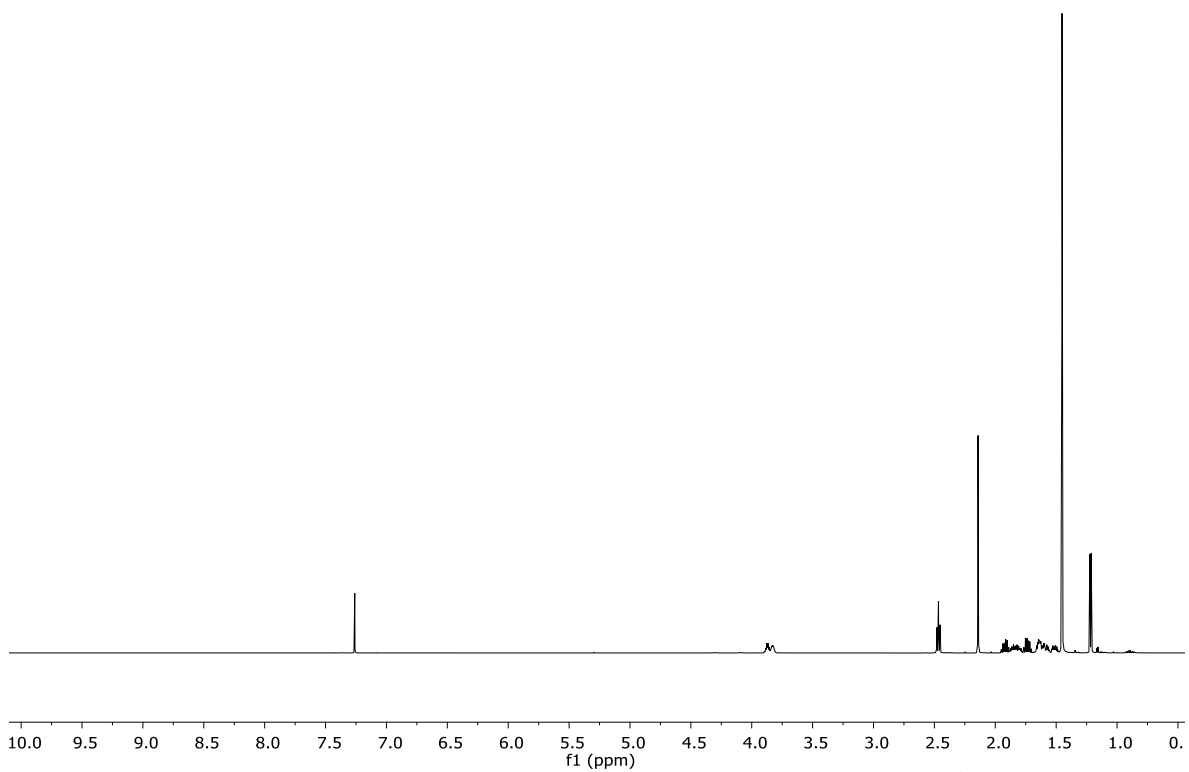

***tert*-Butyl *trans*-2-methyl-6-(3-oxobutyl)piperidine-1-carboxylate (9):** <sup>1</sup>H-NMR (600 MHz, CDCl<sub>3</sub>).

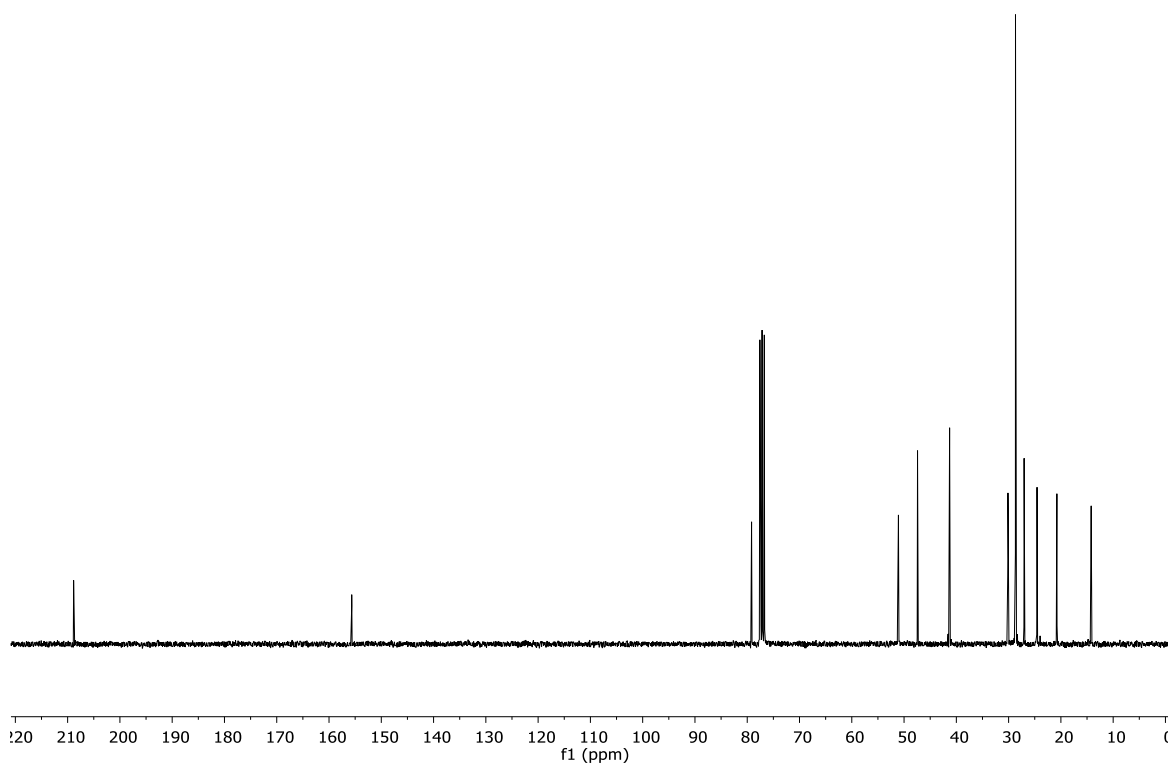

***tert*-Butyl *trans*-2-methyl-6-(3-oxobutyl)piperidine-1-carboxylate (9):**  $^{13}\text{C}$ -NMR (75.5 MHz,  $\text{CDCl}_3$ ).

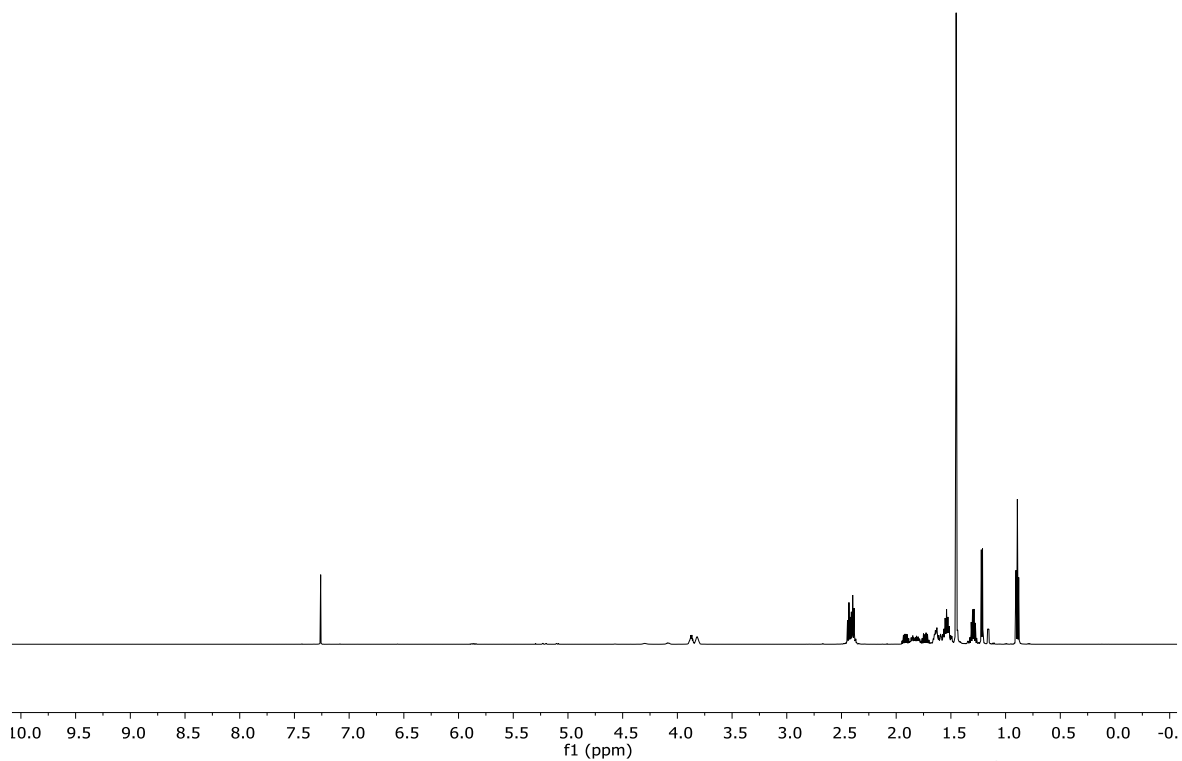

***tert*-Butyl *trans*-2-methyl-6-(3-oxoheptyl)piperidine-1-carboxylate (18):**  $^1\text{H}$ -NMR (600 MHz,  $\text{CDCl}_3$ ).

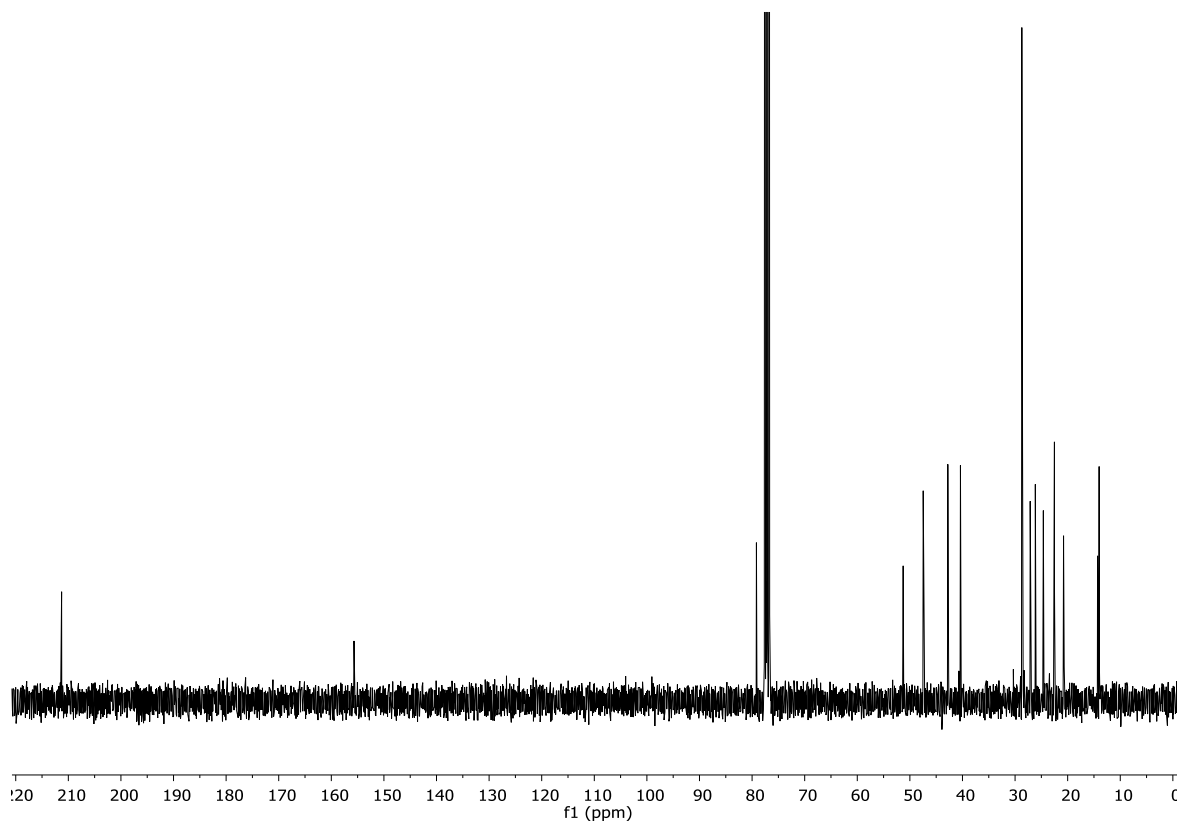

***tert*-Butyl *trans*-2-methyl-6-(3-oxoheptyl)piperidine-1-carboxylate (18):**  $^{13}\text{C}$ -NMR (75.5 MHz,  $\text{CDCl}_3$ ).

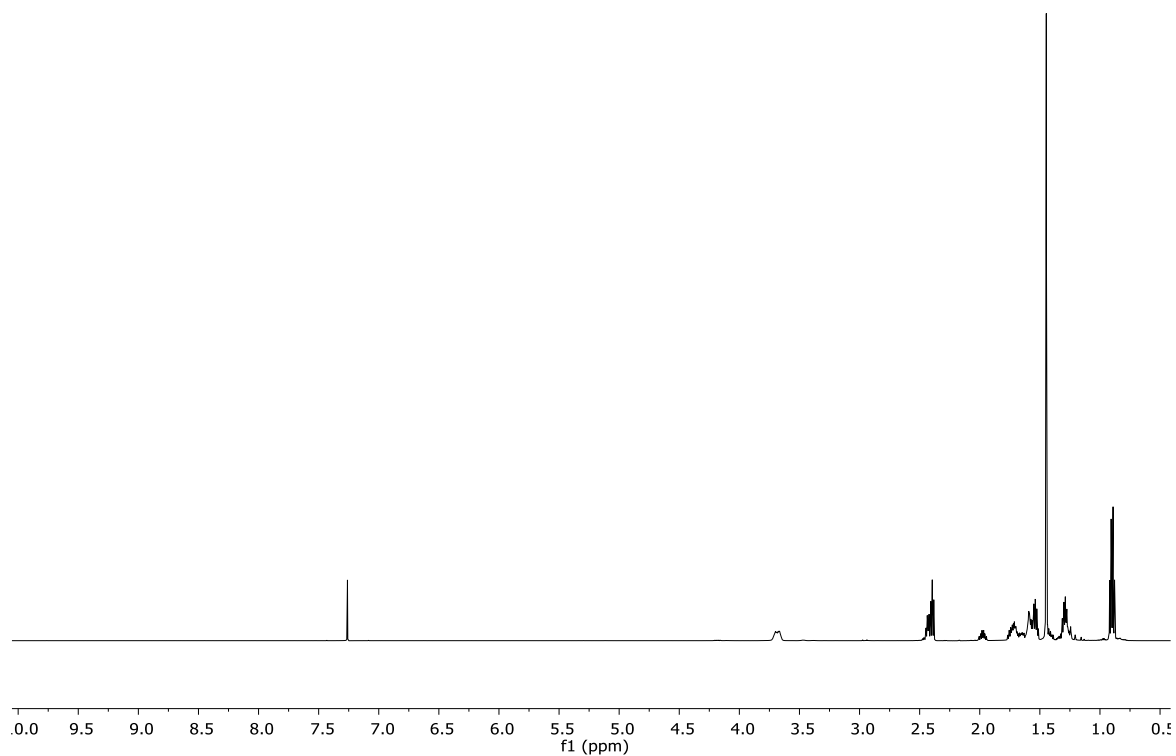

***tert*-Butyl *trans*-2-(3-oxoheptyl)-6-propylpiperidine-1-carboxylate (19):**  $^1\text{H}$ -NMR (600 MHz,  $\text{CDCl}_3$ ).

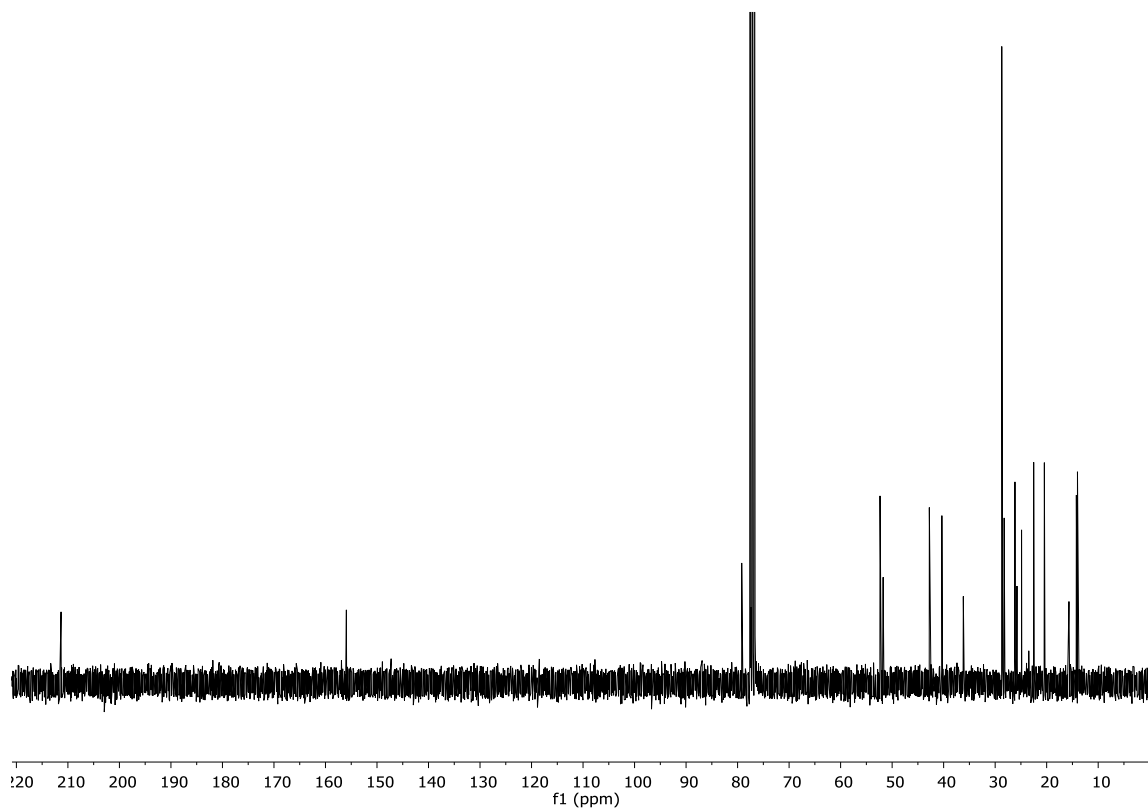

***tert*-Butyl *trans*-2-(3-oxoheptyl)-6-propylpiperidine-1-carboxylate (19):**  $^{13}\text{C}$ -NMR (75.5 MHz,  $\text{CDCl}_3$ ).

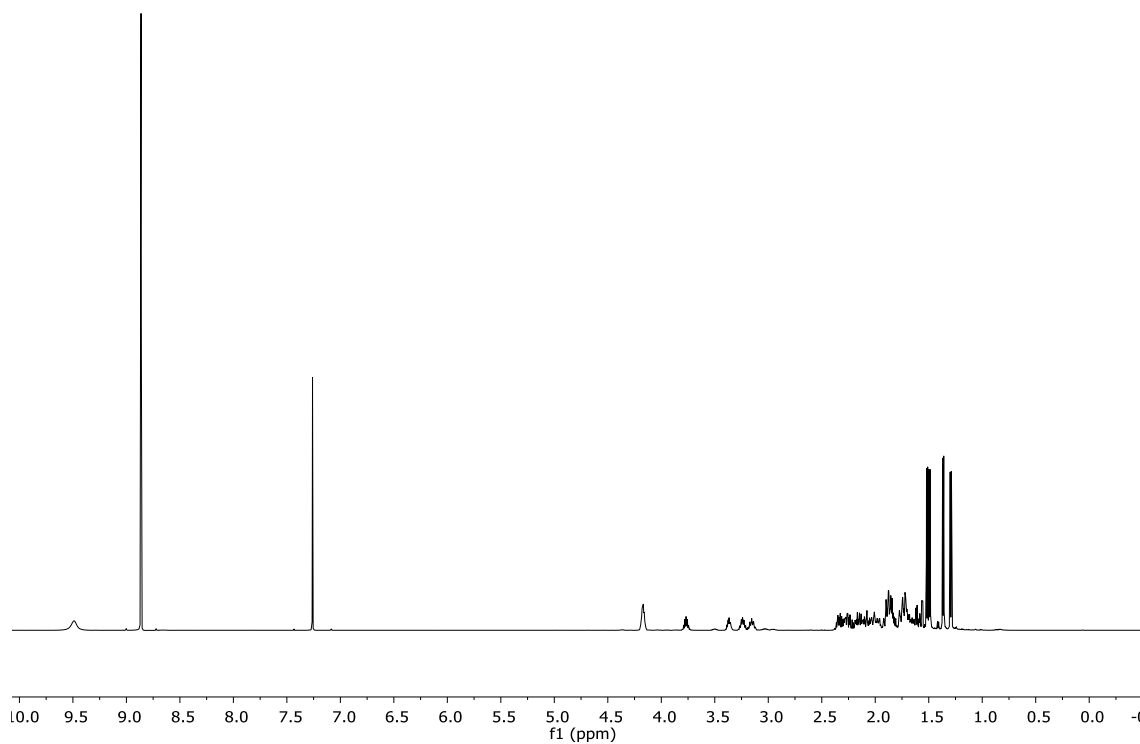

**Mixture of (5*E*,9*Z*)-3,5-Dimethyloctahydroindolizinium 2,4,6-trinitrophenolate (12a) and (5*Z*,9*E*)-3,5-Dimethyloctahydroindolizinium 2,4,6-trinitrophenolate (12b):**  $^1\text{H}$ -NMR (600 MHz,  $\text{CDCl}_3$ ).

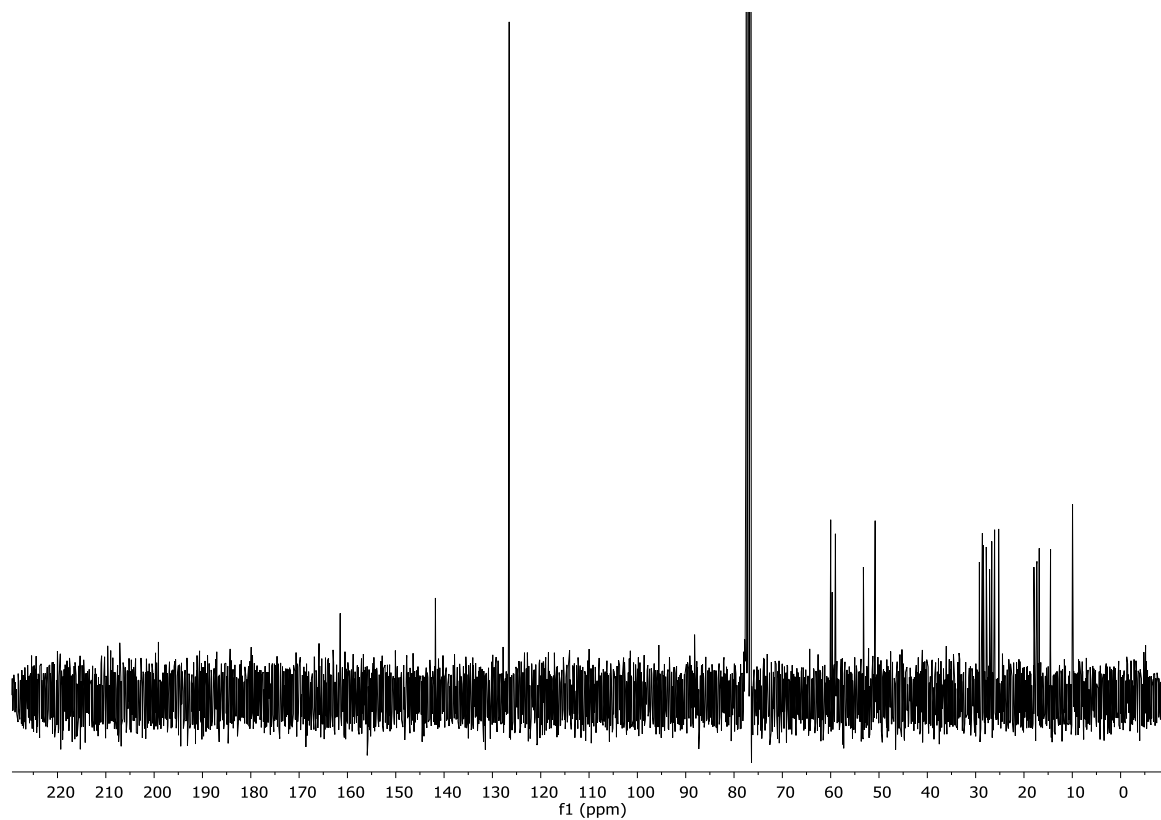

Mixture of (5*E*,9*Z*)-3,5-Dimethyloctahydroindolizinium 2,4,6-trinitrophenolate (12a) and (5*Z*,9*E*)-3,5-Dimethyloctahydroindolizinium 2,4,6-trinitrophenolate (12b):  $^{13}\text{C}$ -NMR (75.5 MHz,  $\text{CDCl}_3$ ).

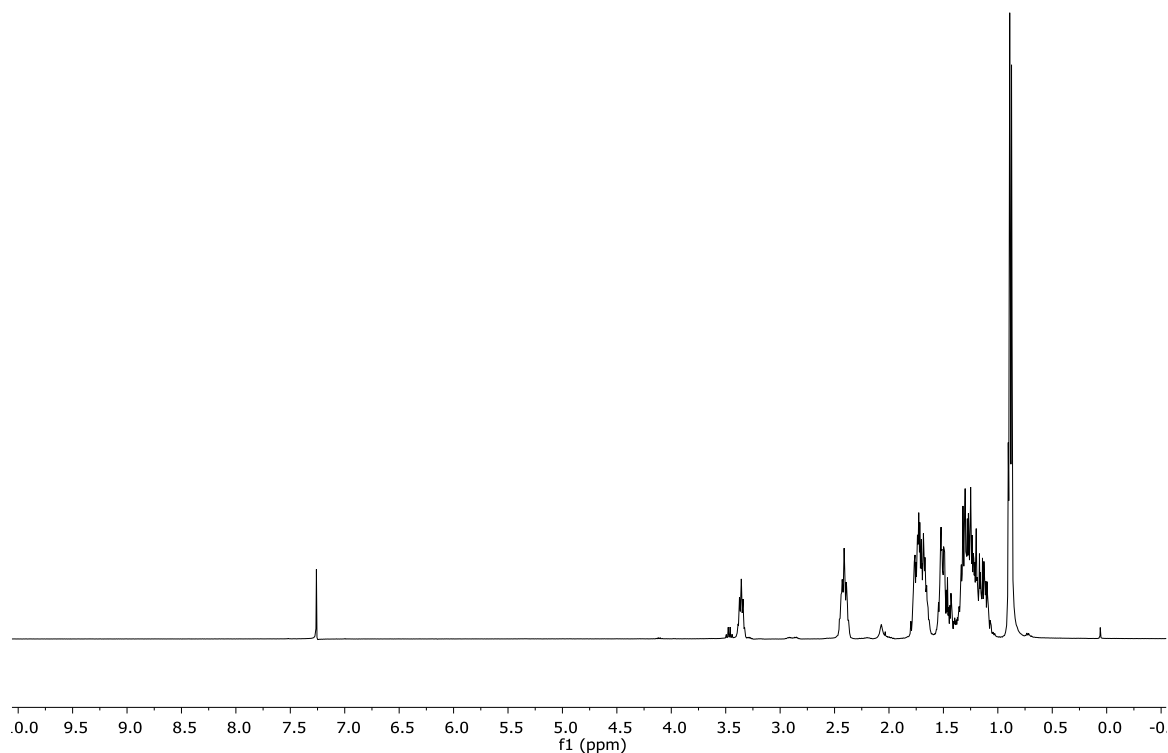

(5*E*,9*Z*)-3-Butyl-5-methyloctahydroindolizine (2a):  $^1\text{H}$ -NMR (400 MHz,  $\text{CDCl}_3$ ).



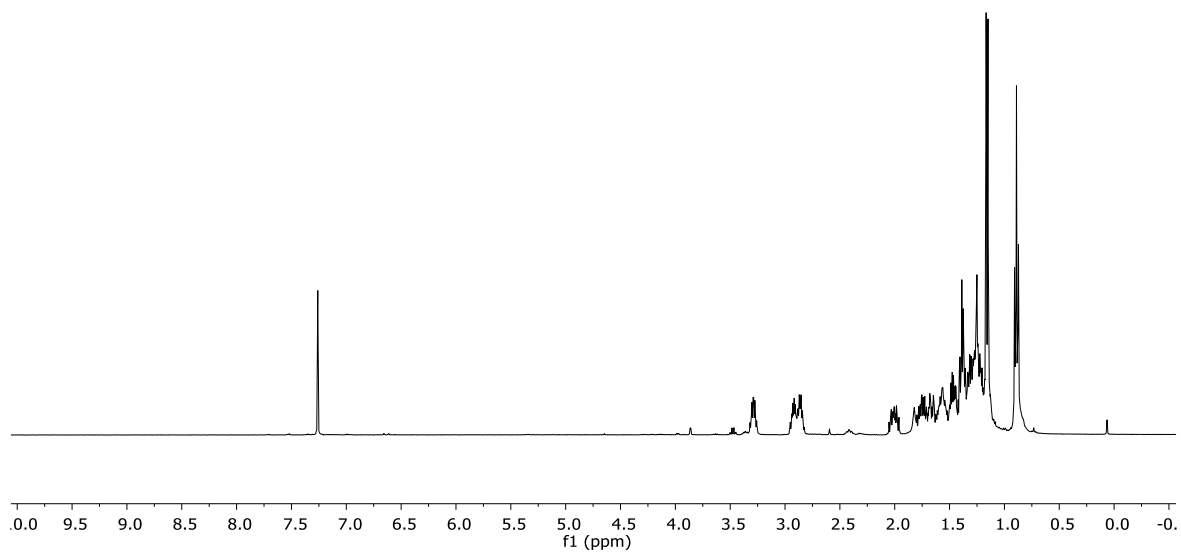

**(5Z,9E)-3-Butyl-5-methyloctahydroindolizine (2b):**  $^1\text{H-NMR}$  (400 MHz,  $\text{CDCl}_3$ ).

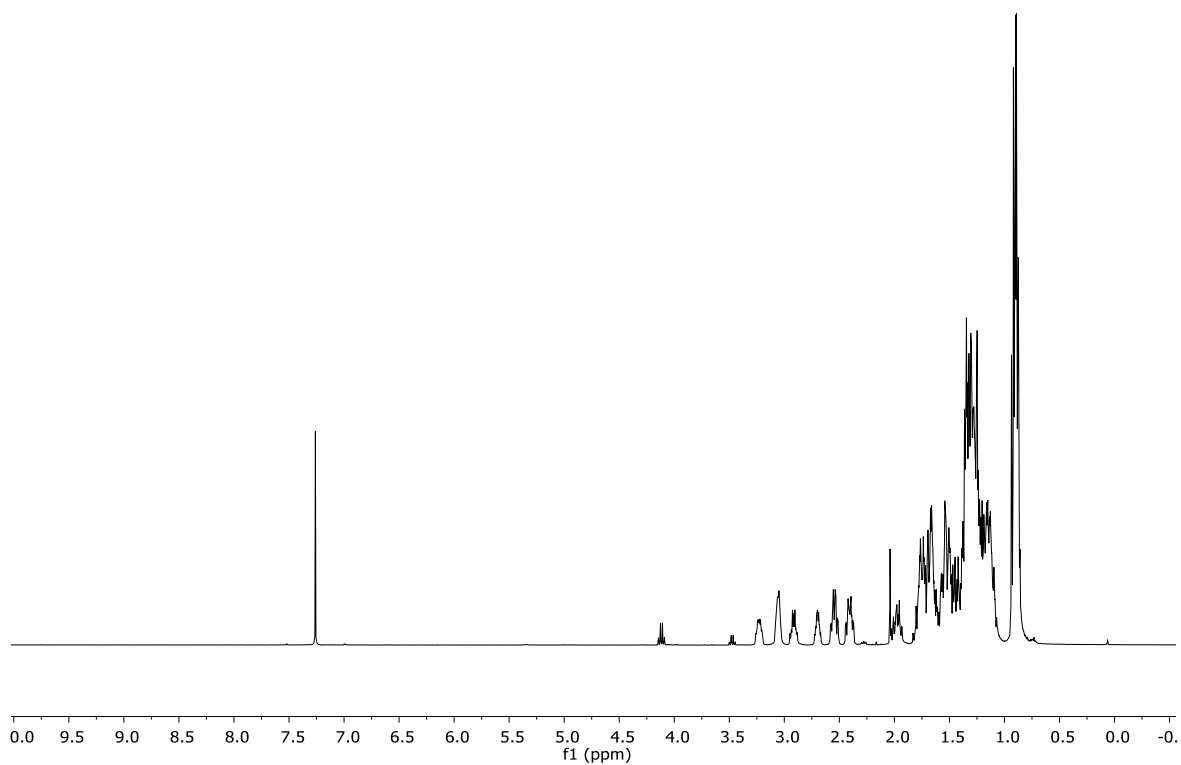

**Mixture of (5E,9Z)-3-Butyl-5-methyloctahydroindolizine (3a) and (5Z,9E)-3-Butyl-5-methyloctahydroindolizine (3b):**  $^1\text{H-NMR}$  (400 MHz,  $\text{CDCl}_3$ ).

**$^1\text{H}$ - $^1\text{H}$ -NOE-spectra of compounds 9, 12, 18 and 19**

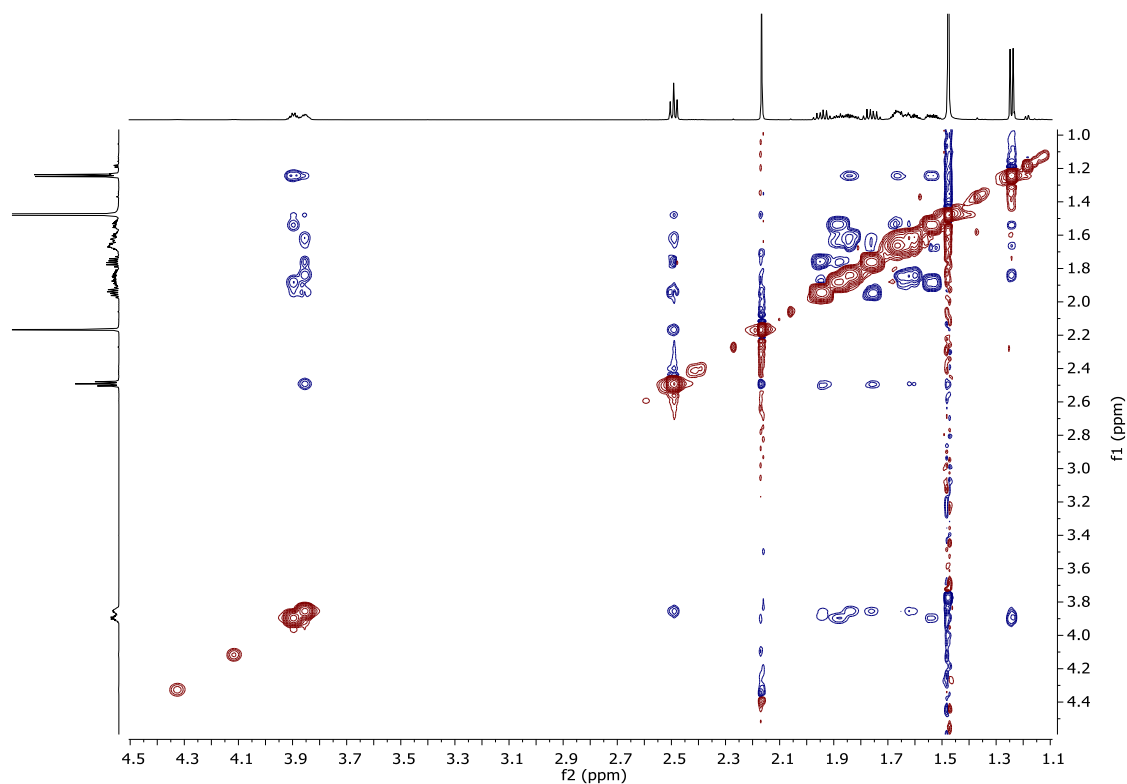

***tert*-Butyl *trans*-2-methyl-6-(3-oxobutyl)piperidine-1-carboxylate (9):  $^1\text{H}$ - $^1\text{H}$ -NOESY (600 MHz,  $\text{CDCl}_3$ ).**

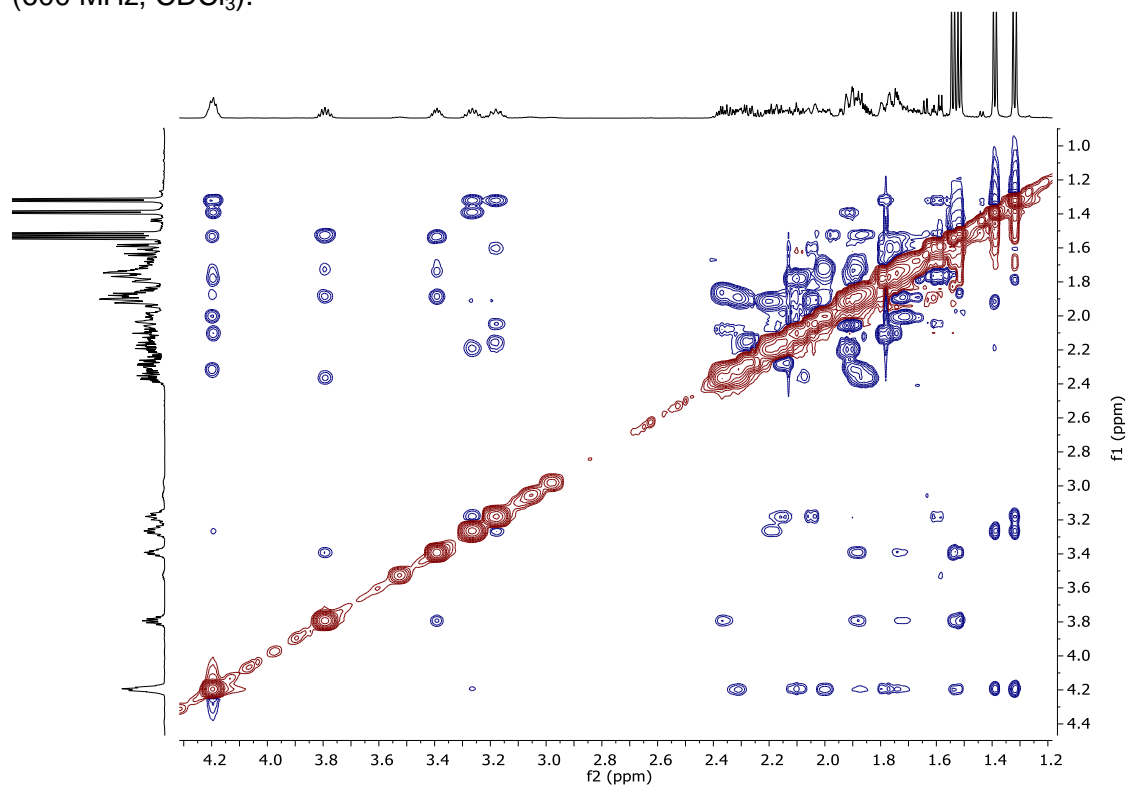

**5,9-*trans*-3,5-Dimethyloctahydroindolizinium 2,4,6-trinitrophenolate (12):  $^1\text{H}$ - $^1\text{H}$ -NOESY (600 MHz,  $\text{CDCl}_3$ ).**

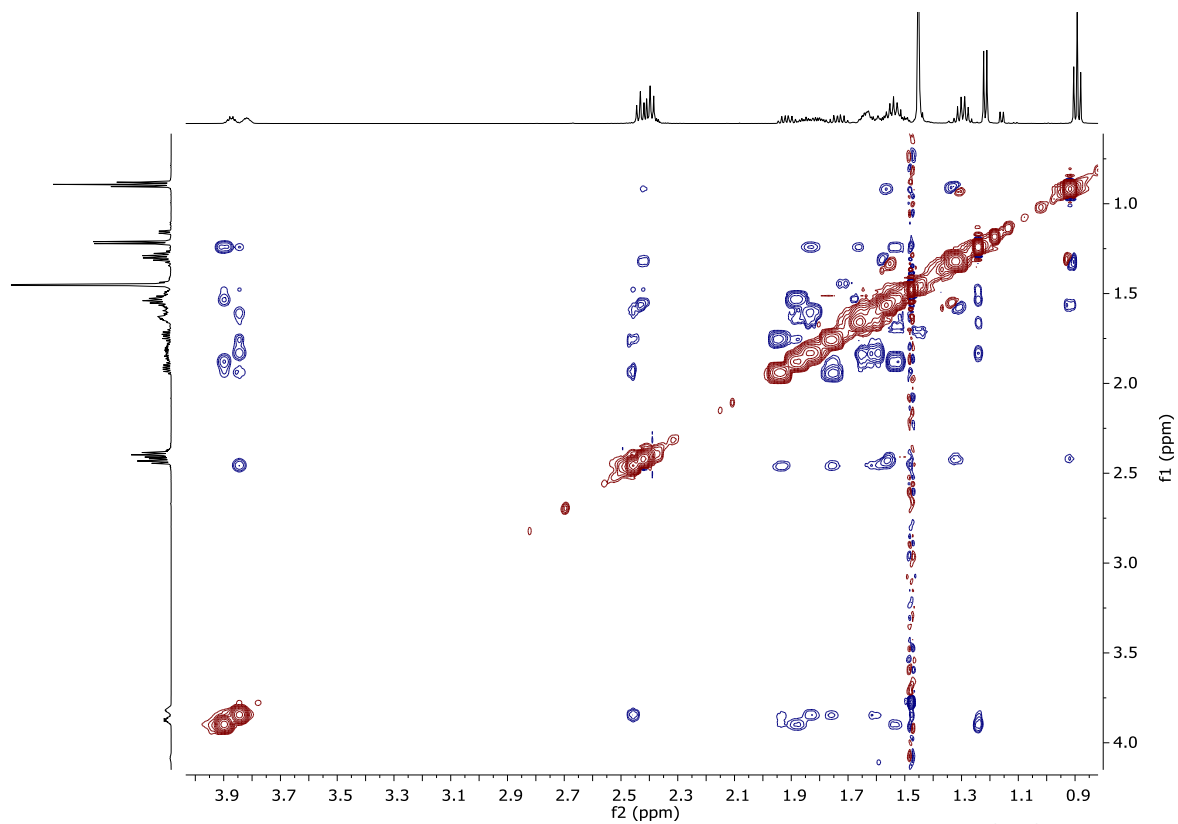

***tert*-Butyl *trans*-2-methyl-6-(3-oxoheptyl)piperidine-1-carboxylate (18):  $^1\text{H}$ - $^1\text{H}$ -NOESY (600 MHz,  $\text{CDCl}_3$ ).**

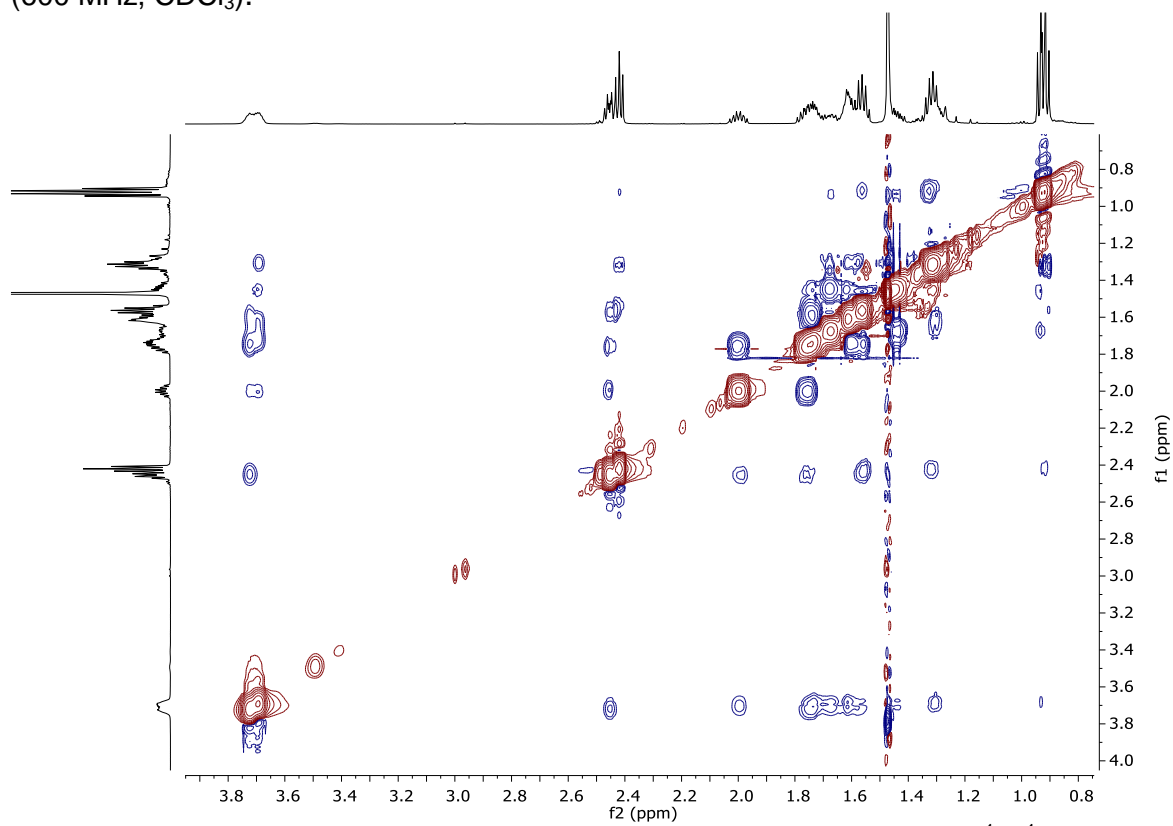

***tert*-Butyl *trans*-2-(3-oxoheptyl)-6-propylpiperidine-1-carboxylate (19):  $^1\text{H}$ - $^1\text{H}$ -NOESY (600 MHz,  $\text{CDCl}_3$ ).**
